# Supplementary material for: MicroRNA-204-5p is a tumor suppressor and potential therapeutic target in head and neck squamous cell carcinoma
Source: PubMed Central journal article supplement (PMC6956807; doi:10.7150/thno.38507), 2020-01-01
Supplement: thnov10p1433s1.pdf [file thnov10p1433s1.pdf]

Figure S1

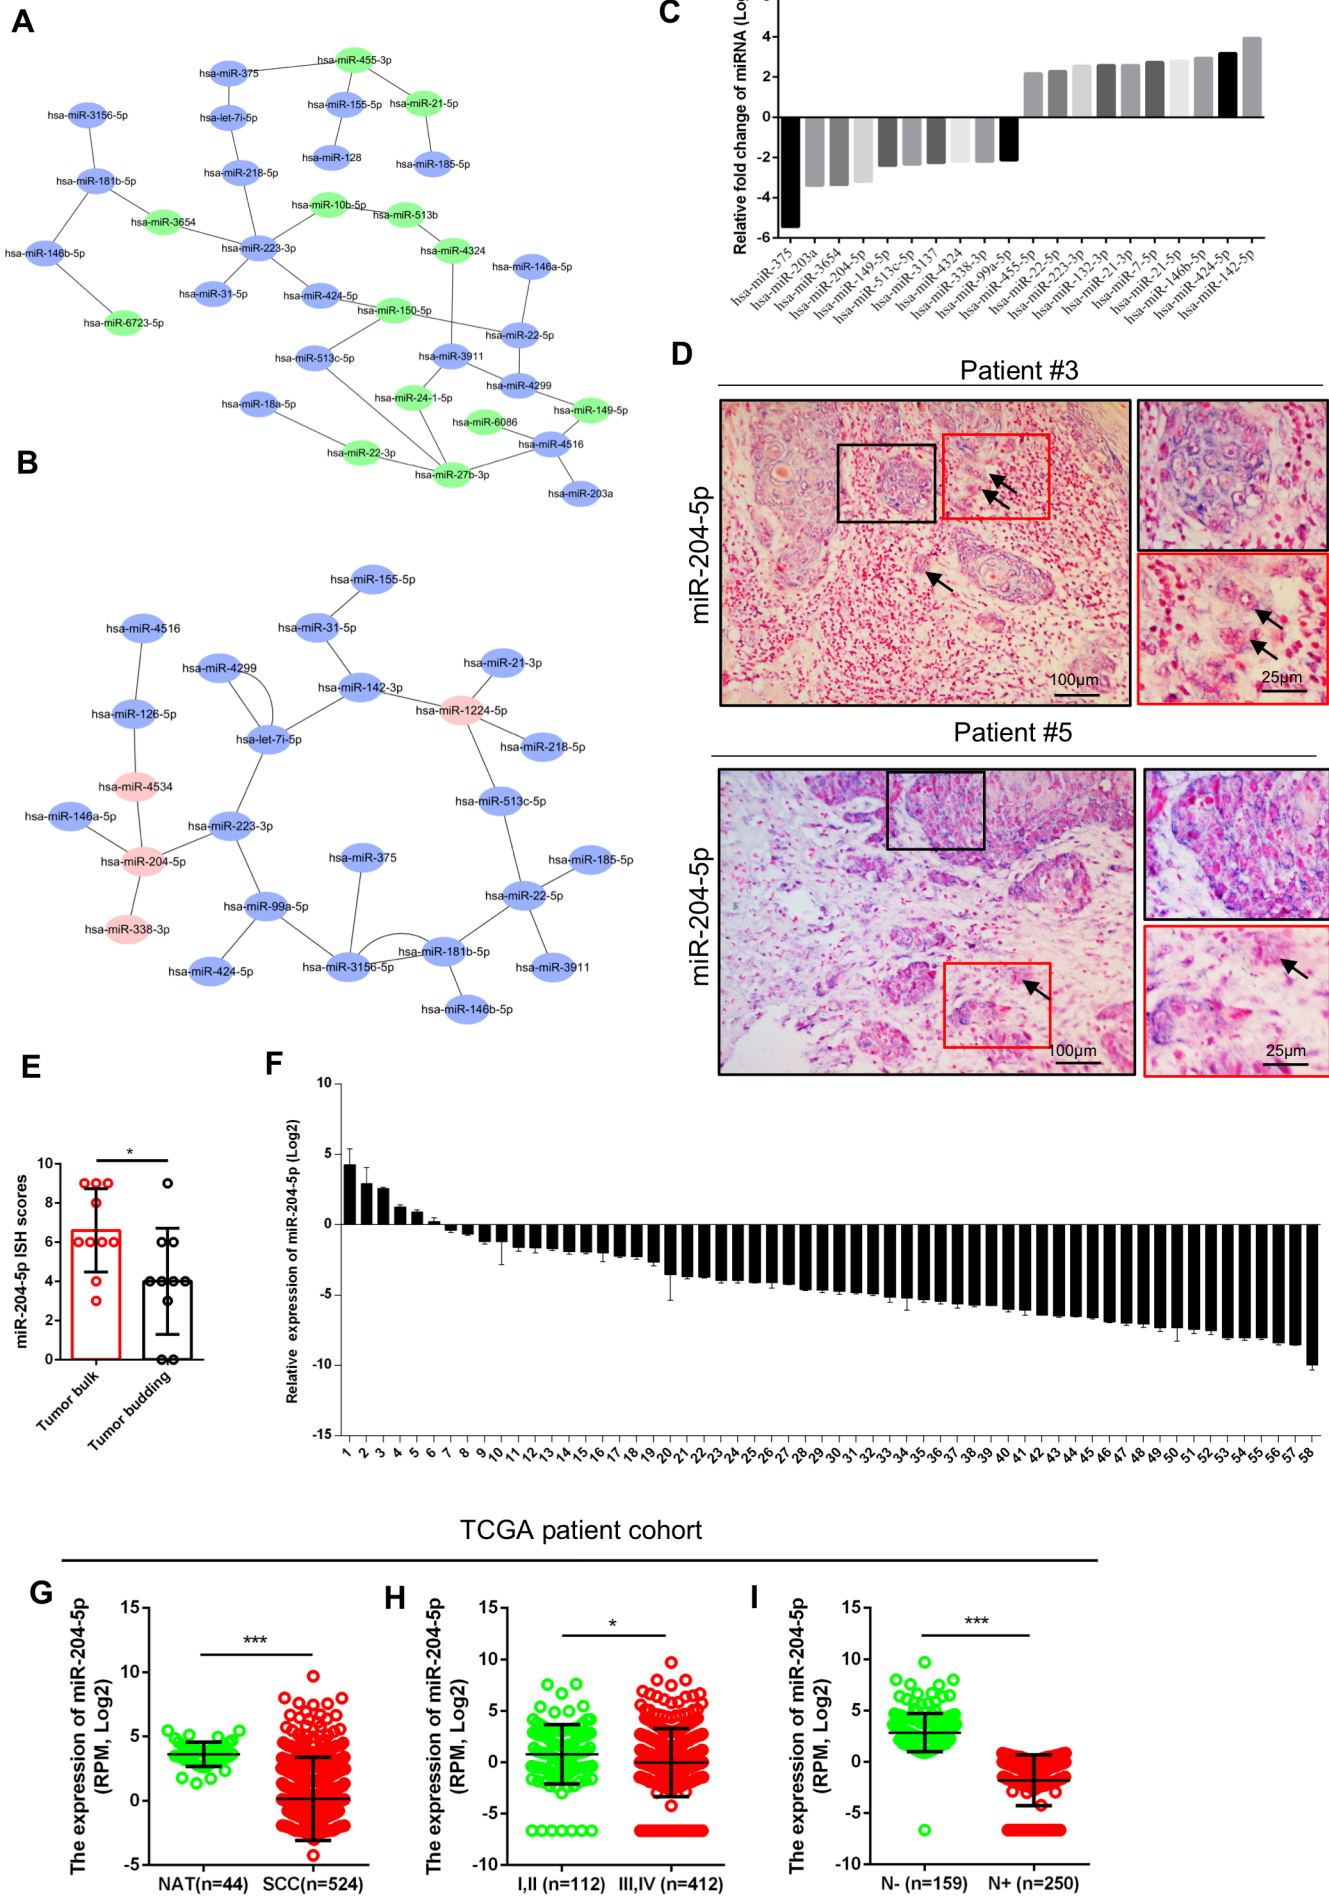

**Figure S1. MiR-204-5p is downregulated in HNSCC and correlative with malignant progression of HNSCC.** (A) Bayes network analysis for miRNA in NAT. The green color represents a miRNA specific expressing in NAT, and the blue color represents the common miRNA in both NAT and HNSCC. (B) Bayes network analysis for miRNA in HNSCC. The red color represents a miRNA specific expressing in HNSCC, and the blue color represents the common miRNA in both NAT and HNSCC. (C) The top ten down-regulation and up-regulation miRNA in 10 HNSCC samples as compared to paired NAT. Bars represent the relative expression levels of each miRNA from array. (D) Representative image of miR-204-5p expression in tumor budding of HNSCC. Tumor budding was indicated with black arrows. (E) The expression of miR-204-5p was decreased in tumor budding as compared to tumor bulk. (F) The expression of miR-204-5p in 58 paired HNSCC samples comparing with NATs. (G) Analysis of miR-204-5p expression in 44 NATs and 524 HNSCC samples from TCGA database, and the HNSCC samples were grouped by the clinical stage (H) and lymph node metastasis (I). Data with pathological lymph node status are available in 409 patients. Data represent mean  $\pm$  SD. \* $P < 0.05$  and \*\*\* $P < 0.001$  by Student's t test.

# Figure S2

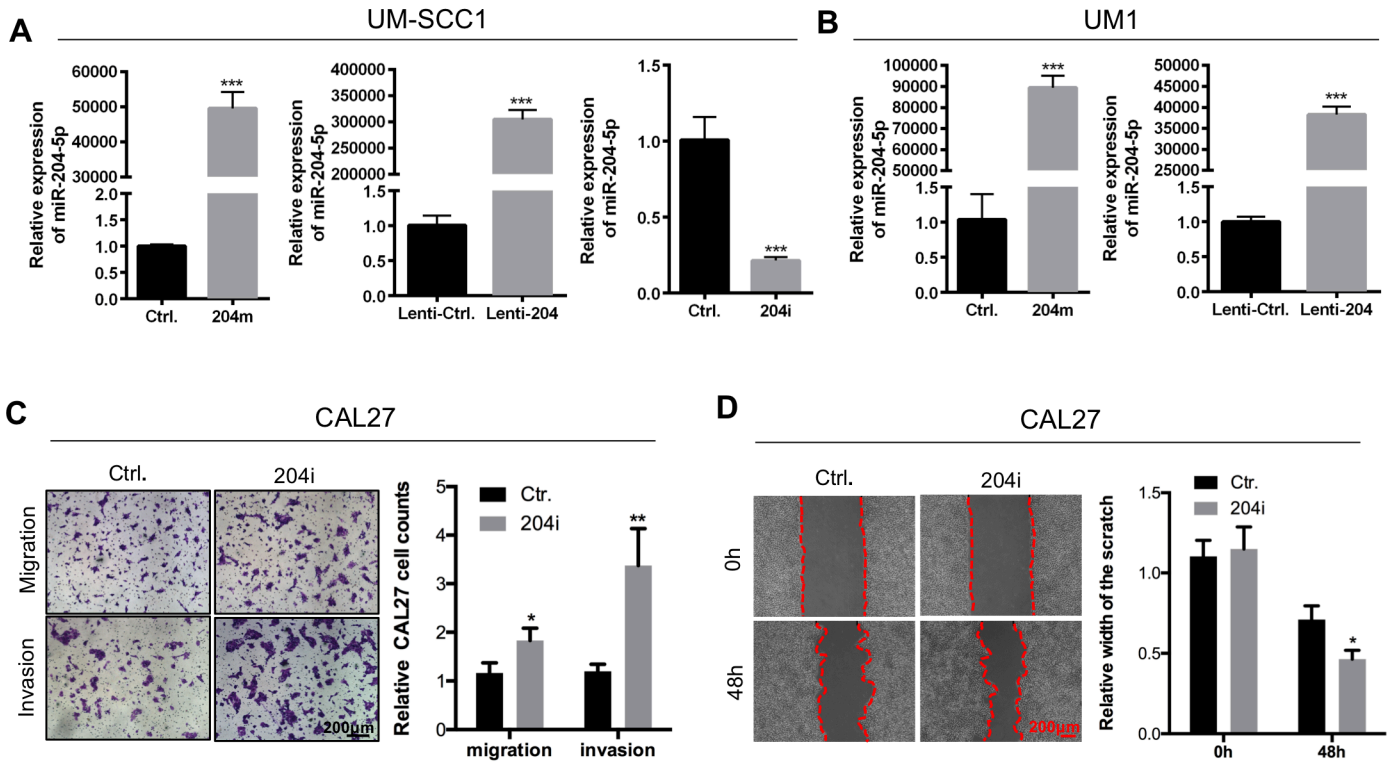

**Figure S2. MiR-204-5p inhibits migration and invasion of HNSCC *in vitro*.** (A, B) The miR-204-5p transfection efficiency was determined in HNSCC cells lines. (C) Cell migratory and invasive capacities was evaluated in HNSCC cells treated with miR-204-5p inhibitors and control inhibitors. (D) The ability of cell motility was evaluated by wound healing assay in HNSCC cells treated with miR-204 inhibitors and control inhibitors. Data represent mean  $\pm$  SD. \*  $P < 0.05$ , \*\*  $P < 0.01$  by Student's t test.

Figure S3

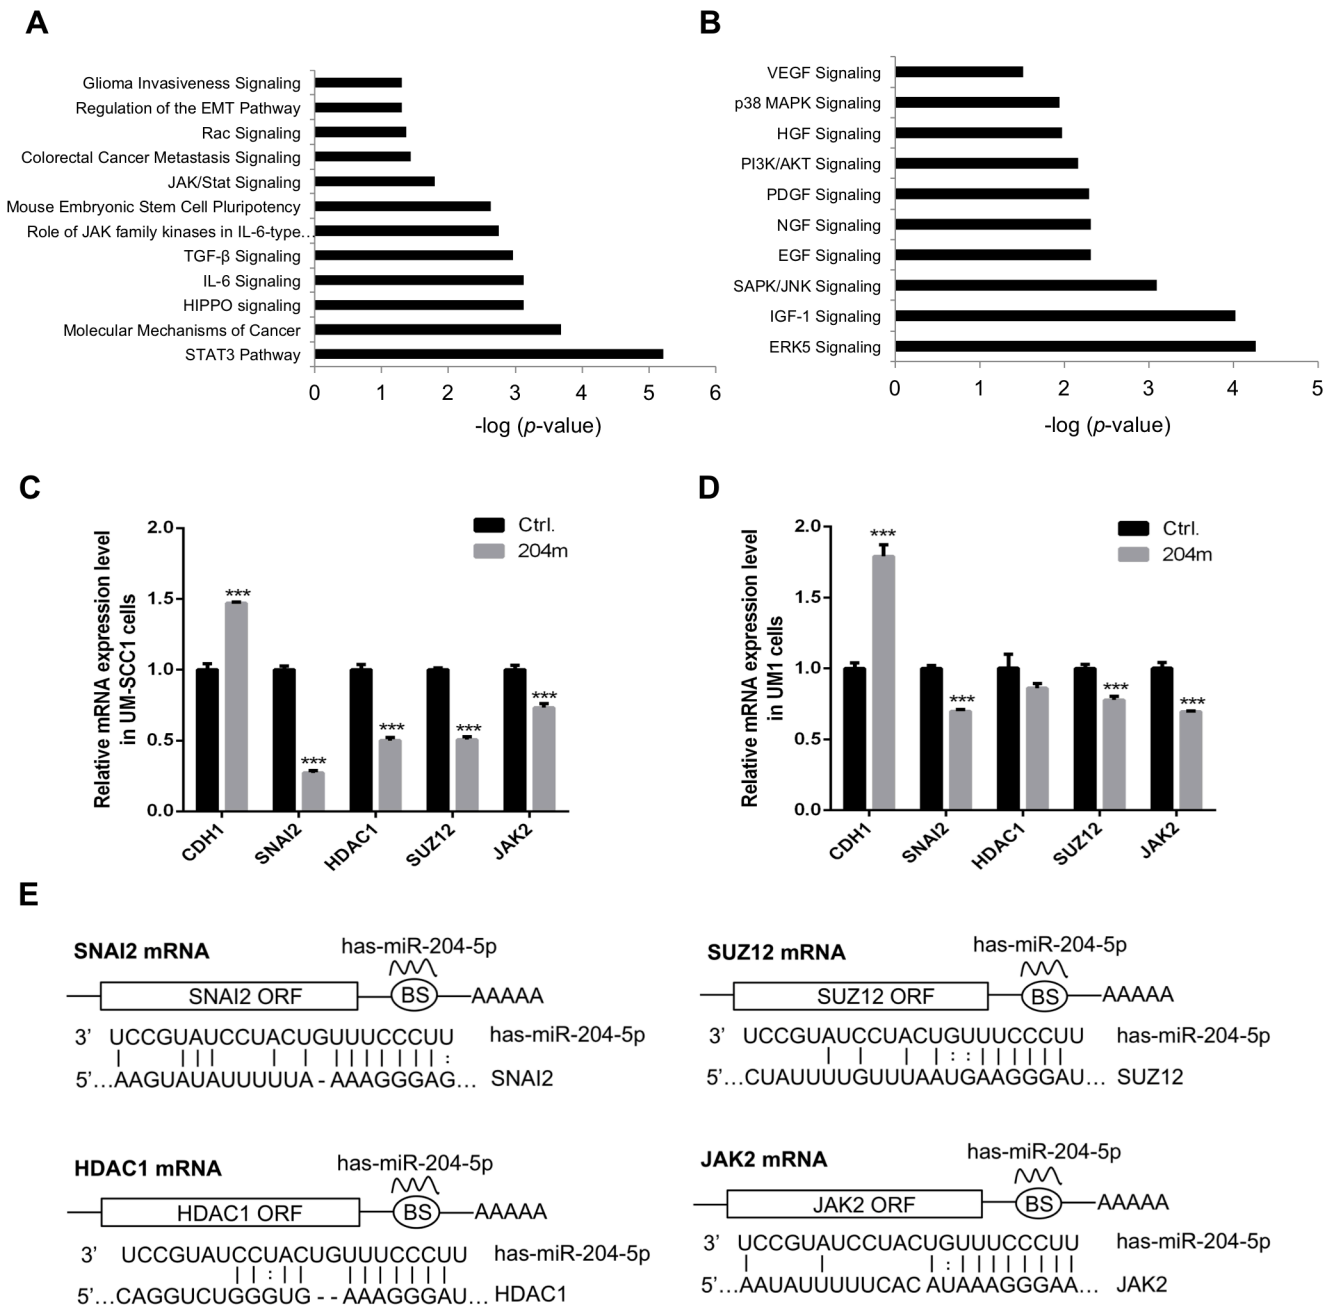

**Figure S3. MiR-204-5p suppresses EMT and STAT3 pathway by targeting SNAI2, SUZ12, HDAC1 and JAK2.** (A) IPA showing that miR-204-5p impacted several pathways involved in metastasis and stemness, including STAT3 and EMT pathway. (B) Major signaling affected by miR-204-5p expression in UM-SCC1 cells which were associated cell proliferation. (C, D) RT-qPCR analysis of CDH1, SNAI2, HDAC1, SUZ12 and JAK2 mRNA expression level in HNSCC cells treated with miR-204-5p mimics. (E) Predicted binding sites in 3'UTRs of SNAI2, SUZ12, HDAC1 and JAK2 mRNA. Data represent mean  $\pm$  SD. \*\*\* $P < 0.001$  by Student's  $t$  test.

Figure S4

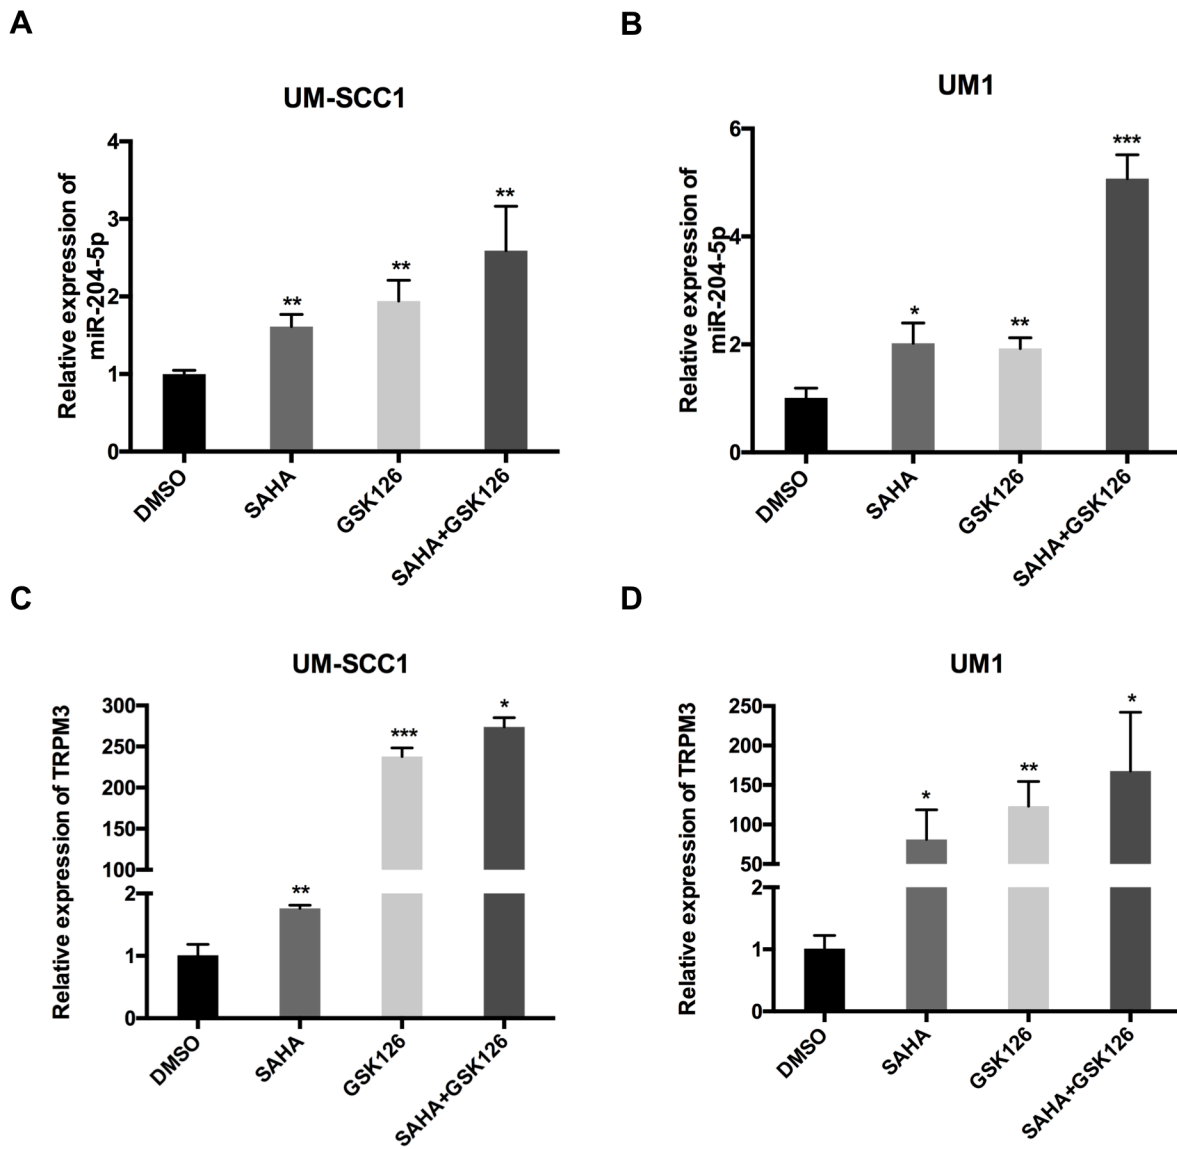

**Figure S4. MiR-204-5p and its host gene are suppressed by SNAI2/PRC2/HDAC1 complex.** (A, B) RT-qPCR analysis of miR-204-5p expression level in HNSCC cells at 24 h after treatment with HDAC1 inhibitor SAHA (3  $\mu$ M), or EZH2 inhibitor GSK126 (5  $\mu$ M), or their combination. (C, D) RT-qPCR analysis of TRPM3 expression level in HNSCC cells at 24 h after treatment with SAHA (3  $\mu$ M), or GSK126 (5  $\mu$ M), or their combination. Data represent mean  $\pm$  SD. \* $P$  < 0.05, \*\* $P$  < 0.01 and \*\*\* $P$  < 0.001 by Student's t test.

Figure S5

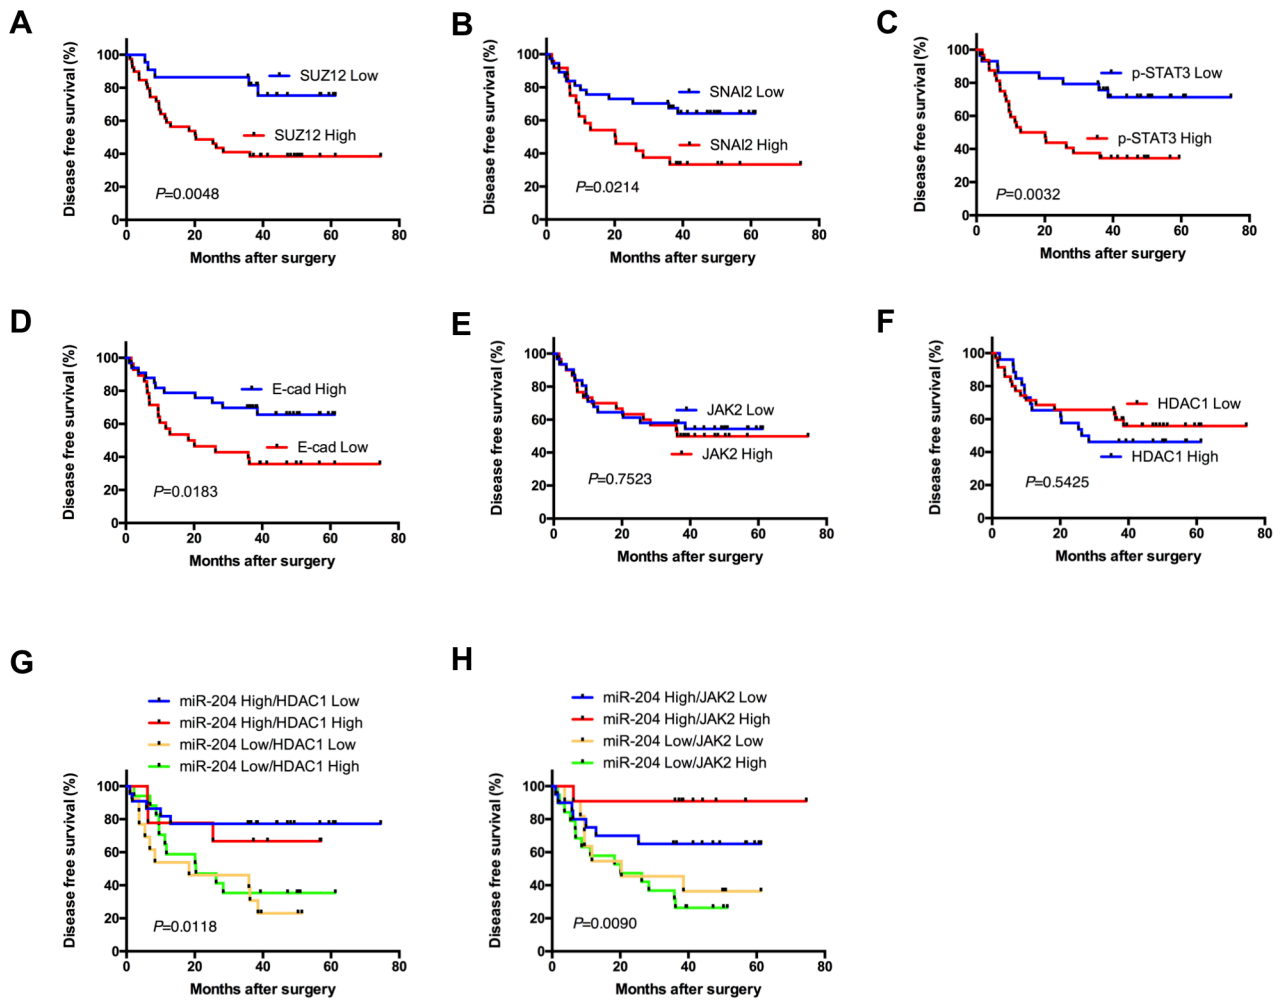

**Figure S5. Decrease of miR-204-5p indicates a poor prognosis in HNSCC patients.** Kaplan–Meier curves for survival of patients with HNSCC that grouped by the expression of miR-204-5p related genes, including SUZ12 (A), SNAI2 (B), p-STAT3 (C), E-cadherin (D), JAK2 (E), and HDAC1 (F). (G, H) Kaplan–Meier analyses for survival of patients with HNSCC that have expression levels of miR-204-5p high or low combined with HDAC1 and JAK2 high or low.  $P$  values of Kaplan–Meier analyses were calculated using log-rank and Gehan–Breslow–Wilcoxon tests.

Figure S6

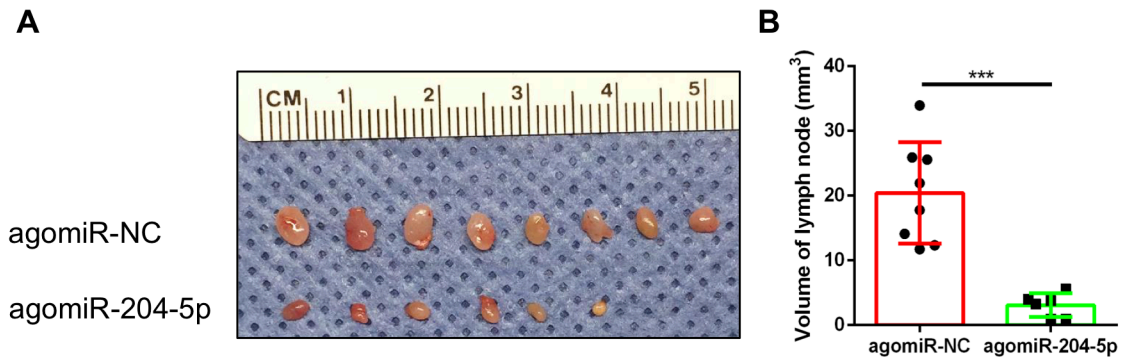

**Figure S6. AgomiR-204-5p inhibits tumor progression in PDX model.** Dissected cervical lymph node (A) and quantitative analysis of cervical lymph node volume (B) harvested from orthotopic PDX treated with agomiR-204-5p and agomiR-NC. Values are mean  $\pm$  SD. n=5. \*\*\* $P < 0.001$  by Student's t test.

Table S1: Characteristics of HNSCC cell lines.

| Cell lines | Primary sites  | Age at sampling | Gender |
|------------|----------------|-----------------|--------|
| UM-SCC1    | Floor of mouth | 72Y             | Male   |
| UM1        | Tongue         | 47Y             | Male   |
| SCC9       | Tongue         | 25Y             | Male   |
| SCC15      | Tongue         | 55Y             | Male   |
| SCC25      | Tongue         | 70Y             | Male   |
| HSC3       | Tongue         | 64Y             | Male   |
| HSC6       | Oral cavity    | NA              | NA     |
| CAL27      | Tongue         | 56Y             | Male   |
| CAL33      | Tongue         | 69Y             | Male   |

NA: data not available.



Table S2: The clinicopathological features of HNSCC patients.

| Patient ID | Diagnosis                                 | Gender | Age (yr) | TNM stage |
|------------|-------------------------------------------|--------|----------|-----------|
| 1          | tongue squamous cell carcinoma            | female | 60       | T4N0M0    |
| 2          | tongue squamous cell carcinoma            | male   | 33       | T1N0M0    |
| 3          | tongue squamous cell carcinoma            | male   | 65       | T2N2cM0   |
| 4          | tongue squamous cell carcinoma            | male   | 39       | T3N1M0    |
| 5          | tongue squamous cell carcinoma            | female | 27       | T2N0M0    |
| 6          | tongue squamous cell carcinoma            | male   | 58       | T1N0M0    |
| 7          | squamous cell carcinoma of floor of mouth | male   | 47       | T3N2M0    |
| 8          | tongue squamous cell carcinoma            | female | 50       | T2N0M0    |
| 9          | squamous cell carcinoma of the gingiva    | male   | 68       | T3N2M0    |
| 10         | squamous cell carcinoma of floor of mouth | male   | 59       | T4N2M0    |
| 11         | tongue squamous cell carcinoma            | female | 37       | T3N0M0    |
| 12         | tongue squamous cell carcinoma            | male   | 47       | T2N1M0    |
| 13         | tongue squamous cell carcinoma            | female | 57       | T3N1M0    |
| 14         | tongue squamous cell carcinoma            | female | 58       | T2N1M0    |
| 15         | oropharyngeal squamous cell carcinoma     | male   | 70       | T3N1M0    |
| 16         | tongue squamous cell carcinoma            | female | 50       | T2N1M0    |
| 17         | tongue squamous cell carcinoma            | male   | 45       | T2N0M0    |
| 18         | tongue squamous cell carcinoma            | female | 50       | T2N0M0    |
| 19         | tongue squamous cell carcinoma            | female | 46       | T3N0M0    |
| 20         | tongue squamous cell carcinoma            | male   | 49       | T1N0M0    |
| 21         | tongue squamous cell carcinoma            | male   | 32       | T2N0M0    |
| 22         | tongue squamous cell carcinoma            | female | 62       | T3N0M0    |
| 23         | tongue squamous cell carcinoma            | female | 49       | T2N1M0    |
| 24         | tongue squamous cell carcinoma            | male   | 73       | T2N1M0    |
| 25         | squamous cell carcinoma of the gingiva    | female | 70       | T3N0M0    |
| 26         | tongue squamous cell carcinoma            | male   | 70       | T3N2M0    |
| 27         | squamous cell carcinoma of floor of mouth | male   | 50       | T3N1M0    |
| 28         | tongue squamous cell carcinoma            | male   | 57       | T2N0M0    |
| 29         | tongue squamous cell carcinoma            | female | 60       | T1N0M0    |

---

|    |                                           |        |    |          |
|----|-------------------------------------------|--------|----|----------|
| 30 | tongue squamous cell carcinoma            | male   | 49 | T3N0M0   |
| 31 | tongue squamous cell carcinoma            | female | 65 | T1N0M0   |
| 32 | tongue squamous cell carcinoma            | female | 30 | T2N0M0   |
| 33 | oropharyngeal squamous cell carcinoma     | male   | 55 | T2N0M0   |
| 34 | squamous cell carcinoma of floor of mouth | male   | 57 | T3N1M0   |
| 35 | tongue squamous cell carcinoma            | male   | 60 | T1N0M0   |
| 36 | buccal squamous cell carcinoma            | male   | 49 | T4N2M0   |
| 37 | squamous cell carcinoma of floor of mouth | male   | 64 | T4aN1M0  |
| 38 | tongue squamous cell carcinoma            | male   | 33 | T2N1M0   |
| 39 | tongue squamous cell carcinoma            | female | 47 | T3N1M0   |
| 40 | tongue squamous cell carcinoma            | female | 41 | T2N1M0   |
| 41 | tongue squamous cell carcinoma            | female | 54 | T2N0M0   |
| 42 | tongue squamous cell carcinoma            | male   | 47 | T2N0M0   |
| 43 | tongue squamous cell carcinoma            | male   | 64 | T3N0M0   |
| 44 | tongue squamous cell carcinoma            | male   | 34 | T2N2bM0  |
| 45 | tongue squamous cell carcinoma            | male   | 43 | T4N0M0   |
| 46 | tongue squamous cell carcinoma            | female | 32 | T2N2cM0  |
| 47 | tongue squamous cell carcinoma            | male   | 59 | T4aN2aM0 |
| 48 | tongue squamous cell carcinoma            | male   | 52 | T2N1M0   |
| 49 | tongue squamous cell carcinoma            | male   | 40 | T2N2bM0  |
| 50 | tongue squamous cell carcinoma            | female | 64 | T2N0M0   |
| 51 | tongue squamous cell carcinoma            | female | 32 | T2N0M0   |
| 52 | tongue squamous cell carcinoma            | male   | 39 | T2N0M0   |
| 53 | squamous cell carcinoma of floor of mouth | male   | 49 | T4N0M0   |
| 54 | tongue squamous cell carcinoma            | male   | 46 | T1N0M0   |
| 55 | tongue squamous cell carcinoma            | female | 63 | T2N0M0   |
| 56 | tongue squamous cell carcinoma            | female | 44 | T3N0M0   |
| 57 | squamous cell carcinoma of the gingiva    | female | 77 | T4N0M0   |
| 58 | tongue squamous cell carcinoma            | female | 42 | T1N0M0   |
| 59 | squamous cell carcinoma of the gingiva    | female | 55 | T2N0M0   |
| 60 | squamous cell carcinoma of floor of mouth | male   | 65 | T2N0M0   |
| 61 | squamous cell carcinoma of the gingiva    | male   | 65 | T2N0M0   |

---

Table S3: List of primers.

| Genes       | Sequences                                                               | Assay    |
|-------------|-------------------------------------------------------------------------|----------|
| SNAI2       | Forward: ATCTGCGGCAAGGCGTTTTCCA<br>Reverse: GAGCCCTCAGATTTGACCTGTC      | qPCR     |
| HDAC1       | Forward: AATGGAGATGTTCCAGCCTAGTGCG<br>Reverse: CACTTGGCGTGTCTTTGATA     | qPCR     |
| SUZ12       | Forward: GCCCTGTGTTATATGTGTTTCACG<br>Reverse: GGTGCTTGTTAATGTGCCAGTAG   | qPCR     |
| JAK2        | Forward: CCAGATGGAACTGTTGCTCAG<br>Reverse: GAGGTTGGTACATCAGAAACACC      | qPCR     |
| CDH1        | Forward: GCCTCCTGAAAAGAGAGTGGAAG<br>Reverse: TGGCAGTGTCTCTCAAATCCG      | qPCR     |
| TRPM3       | Forward: CCAAGCTCAGCATCTGTTCA<br>Reverse: TCCTGGTGTCTTCTGATCC           | qPCR     |
| CDH1-EBOX   | Forward: ACTCCAGGCTAGAGGGTCAC<br>Reverse: GCCCGACCCGACCGCACCCG          | ChIP-PCR |
| CDH1-NEG    | Forward: GCTGTGCCCAGCCTCCATGTTTTA<br>Reverse: CAGGAGATGAAAGAGGGAAGCCA   | ChIP-PCR |
| MIR-204-P1  | Forward: TACCATATAGGACAGCTTGACGG<br>Reverse: GAAATGCCTAGCATGGTGCTTG     | ChIP-PCR |
| TRMP3-TSS   | Forward: ACAGGCTGTTTTGTGCAGGCTGTC<br>Reverse: ATGTGGCTGAATGGAGGCACACT   | ChIP-PCR |
| MIR-204-TSS | Forward: TTCCTGATCGCGTACCCATGGCTA<br>Reverse: TGCCTTCCCAGCCTCCTTCATAT   | ChIP-PCR |
| TRMP3-NEG   | Forward: GGTGAGTGATGTTTAATAGCCAGG<br>Reverse: CCAACTCCATGTTGTGGCATCAT   | ChIP-PCR |
| SNAI2       | Forward: ACTCCATTACATGTCGGTTGTCTG<br>Reverse: CATTCTCCTGTGTTTTGTTCTTG   | RIP-PCR  |
| HDAC1       | Forward: GACAACTCCTGAAATGCCAAGTG<br>Reverse: ACAGGAGATCCTTGAAGACCCAG    | RIP-PCR  |
| SUZ12       | Forward: TTGGAAACAGATAGTGTCTCAGGG<br>Reverse: CATCTAACAGTGCCTGTTTGG AAC | RIP-PCR  |
| JAK2        | Forward: GCCAGCATTATAAGCAGGTGTAT<br>Reverse: TGTATTATTTAGGGTCAGGGAAA    | RIP-PCR  |

Table S4: List of primary antibodies.

| Antibodies                          | Source              | Identifier     |
|-------------------------------------|---------------------|----------------|
| SUZ12 (Polyclonal)                  | Abcam               | Cat#ab12073    |
| SNAI2 (Clone C19G7)                 | Cell Signaling Tech | Cat#9585       |
| E-Cadherin (Clone 24E10)            | Cell Signaling Tech | Cat# 3195      |
| HDAC1 (Clone D5C6U)                 | Cell Signaling Tech | Cat# 34589     |
| STAT3 (Clone D3Z2G)                 | Cell Signaling Tech | Cat#12640      |
| Phospho-STAT3 (Tyr705) (Clone D3A7) | Cell Signaling Tech | Cat#9145       |
| JAK2 (Clone D2E12)                  | Cell Signaling Tech | Cat#3230       |
| EZH2 (Clone D2C9)                   | Cell Signaling Tech | Cat #5246      |
| H3K27me3 (Clone mAbcam 6002 )       | Abcam               | Cat#ab6002     |
| FLAG (Clone M2)                     | Sigma-Aldrich       | Cat#F1804      |
| HA (Clone 16B12)                    | Covance             | Cat# MMS-101P  |
| $\alpha$ -Tubulin (Clone 11H10)     | Cell Signaling Tech | Cat#2125       |
| Pan-Cytokeratin                     | Novus               | Cat#NBP1-22909 |
| AGO2                                | Abcam               | Cat#ab32381    |
| $\beta$ -actin                      | Abcam               | Cat#ab8227     |
| STAT3 (Clone 124H6)                 | Cell Signaling Tech | Cat# 9139      |
| p-STAT3 (Clone D3A7)                | Cell Signaling Tech | Cat# 9145      |
